# Supplementary material for: 4-Substituent pyridine directed cobalt(ii) azides: solvothermal synthesis, structure, and magnetic properties
Source: Royal Society of Chemistry journal article supplement (doi:10.1039/c5dt00568j), 2015-01-01
Supplement: c5dt00568j1.pdf [file c5dt00568j1.pdf]

## Supporting Information

### 4-Substituent Pyridines Directed Cobalt(II) Azides: Solvothermal Synthesis, Structure, and Magnetic Properties

Jiong-Peng Zhao,<sup>†,‡,§</sup> Cui Zhao,<sup>†</sup> Wei-Chao Song,<sup>‡</sup> Lei Wang,<sup>§</sup> Yabo Xie,<sup>†</sup> Jian-Rong  
Li,<sup>†,\*</sup> and Xian-He Bu<sup>‡</sup>

<sup>†</sup> *Beijing Key Laboratory for Green Catalysis and Separation, College of Environmental and  
Energy Engineering, Beijing University of Technology, Beijing 100124, P. R. China*

<sup>‡</sup> *Department of Chemistry, Nankai University, Tianjin 300071, P. R. China*

<sup>§</sup> *School of Chemistry and Chemical Engineering, Tianjin University of Technology, Tianjin  
300384, China*

---

\* Corresponding author. E-mail: jrli@bjut.edu.cn.

To *Dalton Trans.* (Article)

## Additional Figures

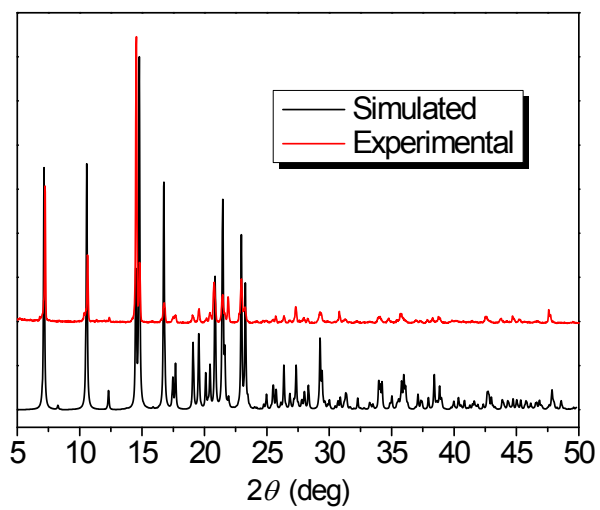

(a)

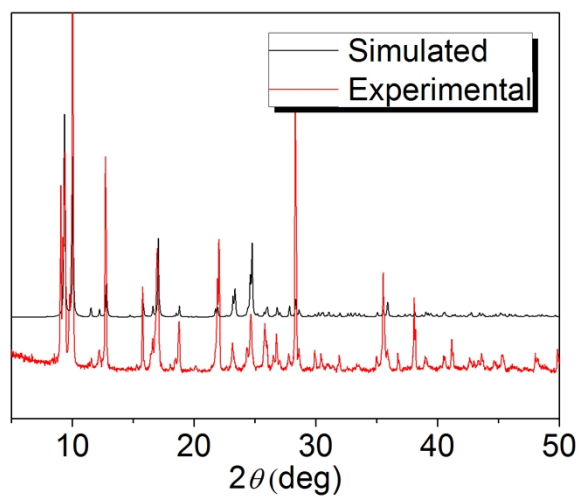

(b)

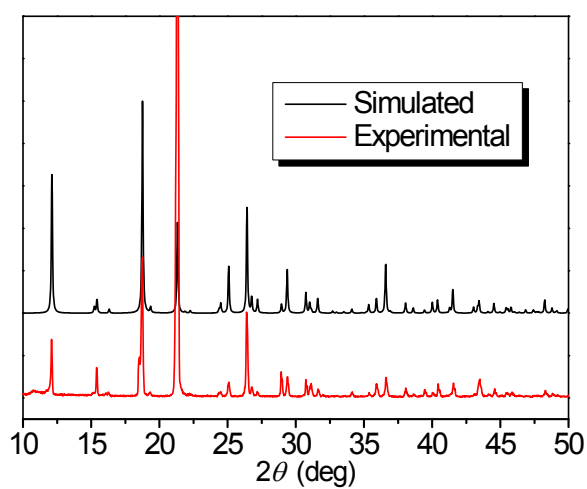

(c)

**Fig. S1.** XRPD patterns for **1** (a), **2** (b), and **3** (c).

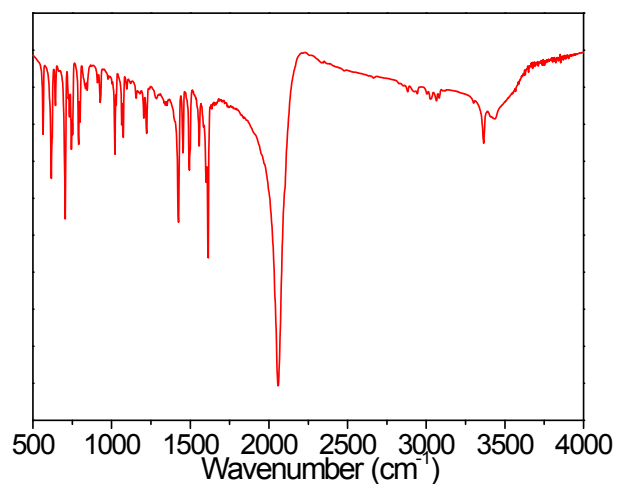

(a)

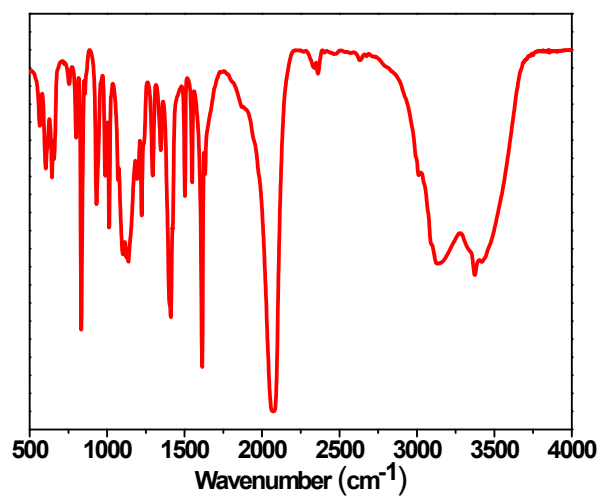

(b)

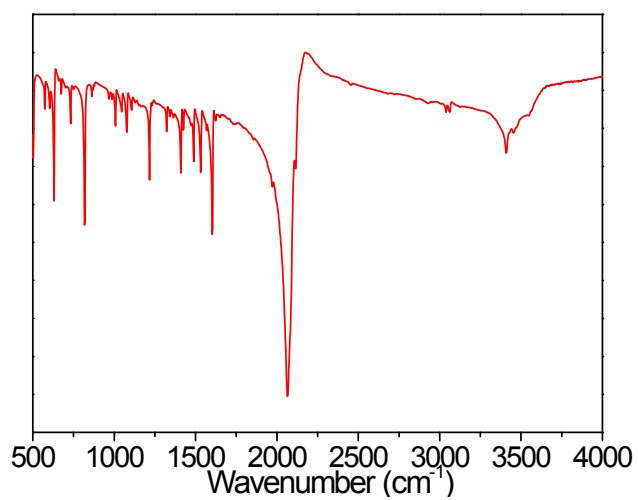

(c)

**Fig. S2.** FT-IR spectra of **1** (a), **2** (b), and **3** (c).

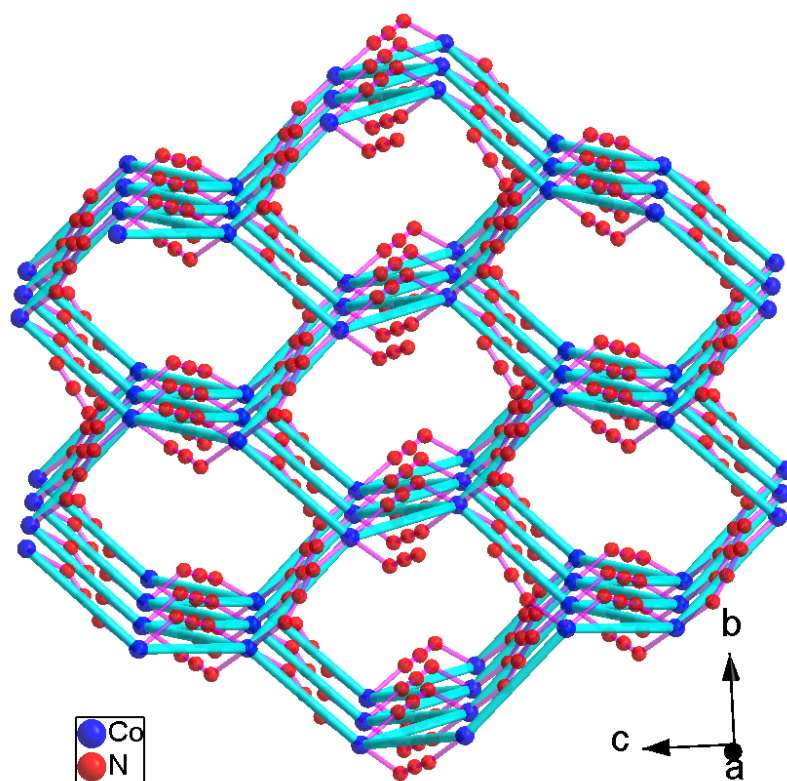

**Fig. S3.** 3D azide-bridged diamondoid framework in **3** viewed along the *a* direction showing the 4-connected topology and two kinds of single helices (generated by  $2_1$  axis) in this direction.

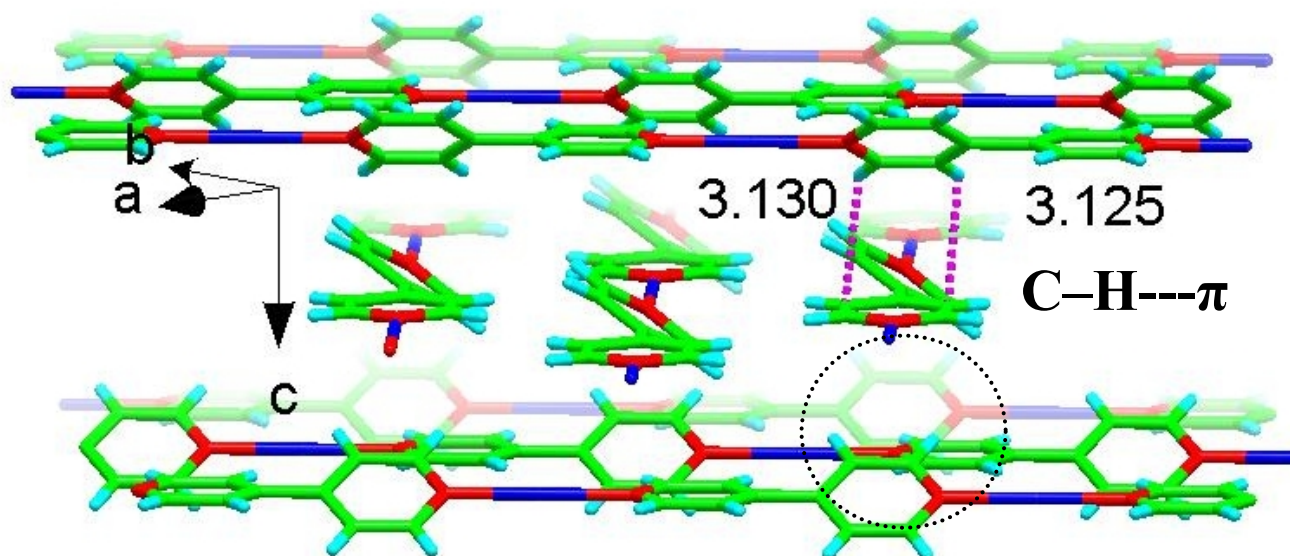

**Fig. S4.** Packing of Co(II)-bipy chains in **3** showing perpendicular array and C-H... $\pi$  interactions.

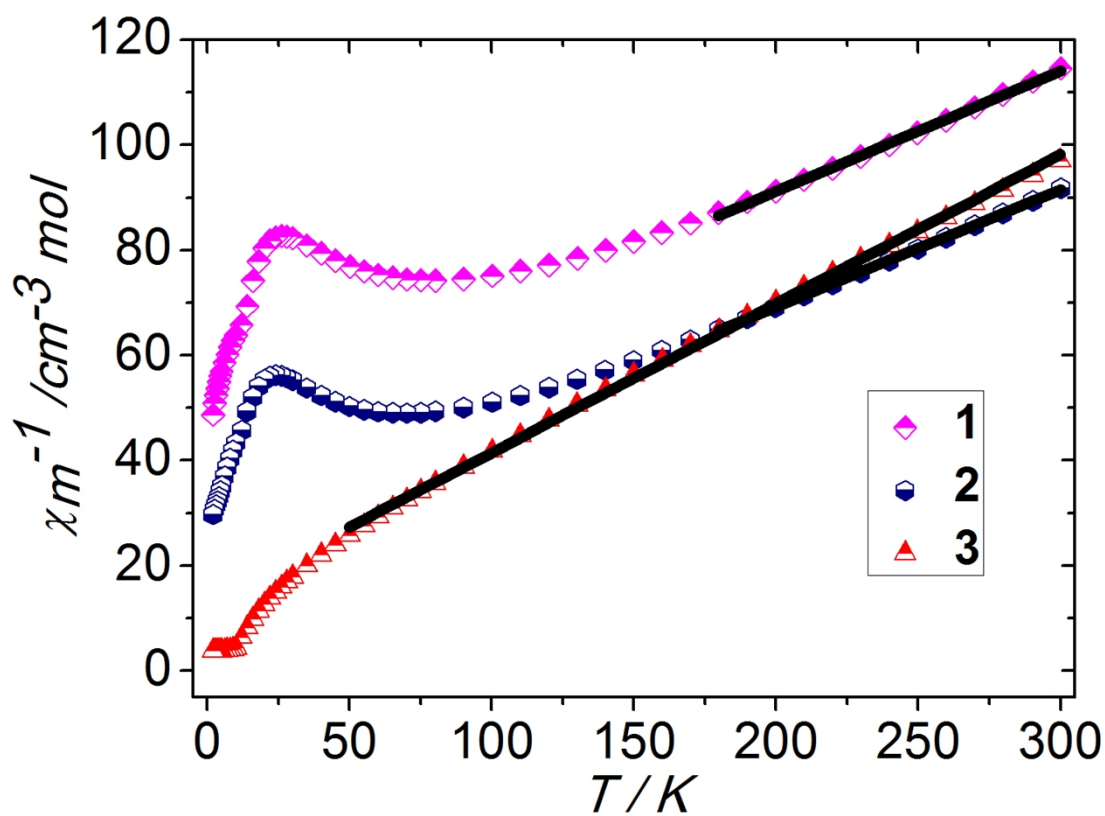

Fig. S5. Temperature dependence of  $1/\chi_M$  for 1, 2, and 3.

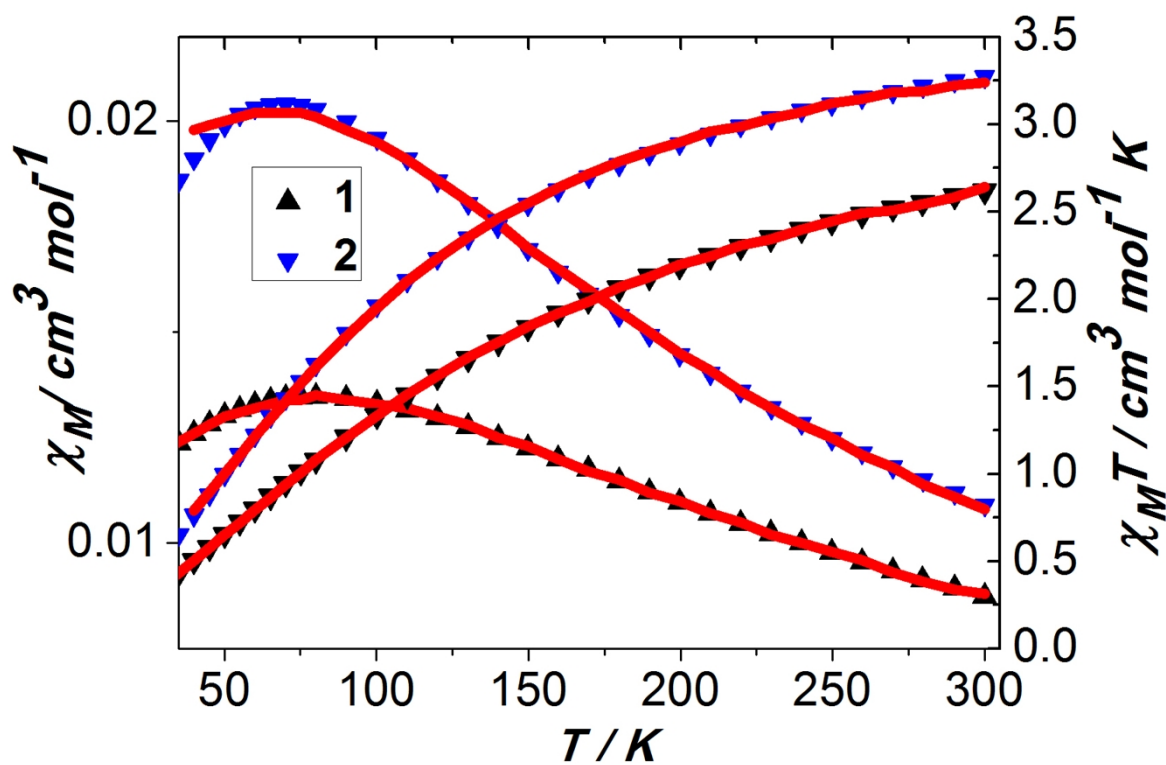

Fig. S6. The  $\chi_M$  and  $\chi_M T$  vs.  $T$  plot for 1 and 2 in 40~300 K. The red solid line is the best fitting of it.

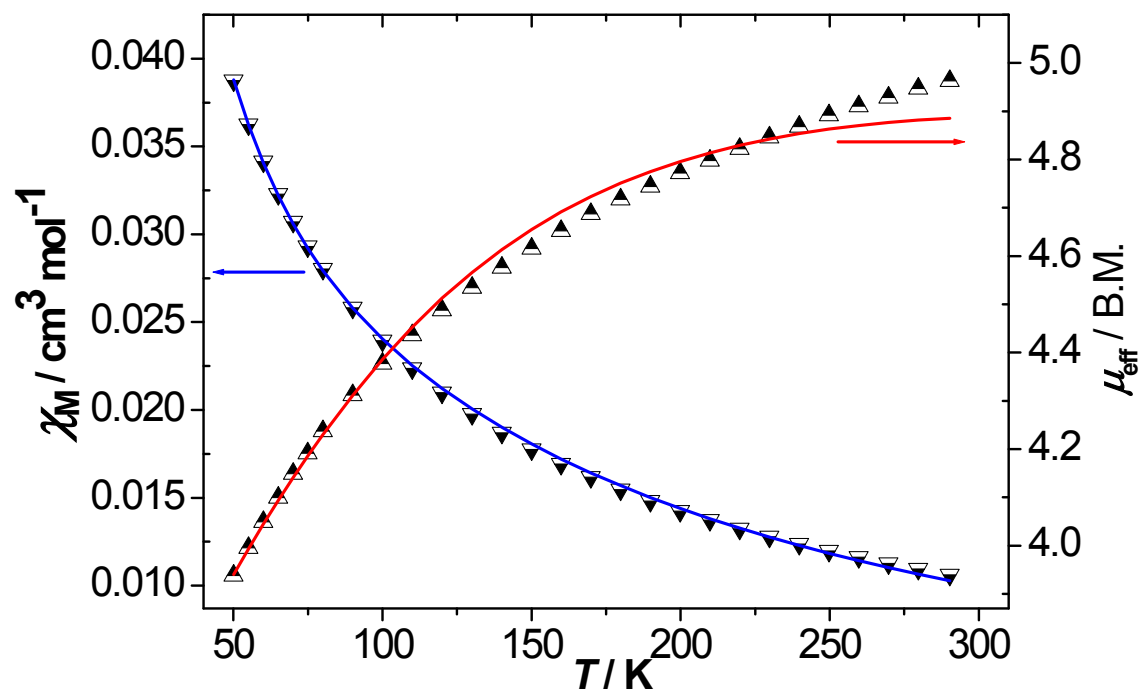

Fig. S7. Fitting of the susceptibility data of 3.
